# Supplementary material for: Ferroelastic lattice rotation and band-gap engineering in quasi 2D layered-structure PdSe2under uniaxial stress
Source: Royal Society of Chemistry journal article supplement (doi:10.1039/c9nr03101d), 2019-01-01
Supplement: c9nr03101d1.pdf [file c9nr03101d1.pdf]

# Electronic Supplementary Information

## Ferroelastic lattice rotation and band-gap engineering in quasi 2D layered-structure PdSe<sub>2</sub> under uniaxial stress

Wen Lei,<sup>#a</sup> Bo Cai,<sup>#b</sup> Huanfu Zhou,<sup>c</sup> Gunter Heymann,<sup>d</sup> Xin Tang,<sup>c</sup> Shengli Zhang,<sup>\*b</sup> Xing Ming<sup>\*a</sup>

*a. College of Science, Guilin University of Technology, Guilin 541004, China.*

*b. MIIT Key Laboratory of Advanced Display Materials and Devices, School of Materials Science and Engineering, Nanjing University of Science and Technology, Nanjing 210094, China.*

*c. Key Lab of New Processing Technology for Nonferrous Metal & Materials, Ministry of Education, School of Materials Science and Engineering, Guilin University of Technology, Guilin 541004, China.*

*d. Institute of General, Inorganic and Theoretical Chemistry, Leopold-Franzens-University Innsbruck, Innrain 80-82, A-6020 Innsbruck, Austria.*

<sup>#</sup>These authors contributed equally to this work.

<sup>\*</sup>Email: mingxing@glut.edu.cn (Xing Ming); zhangslvip@njust.edu.cn (Shengli Zhang)

**Table S1** Theoretical predicted together with experimental measured equilibrium lattice constants, cell volume and positional parameters (Pd(0, 0, 0) and Se(x, y, z)) of the orthorhombic PdSe<sub>2</sub>. The data calculated within GGA-PBE and DFT-D (TS) are from present work.

|                | <i>a</i> (Å) | <i>b</i> (Å) | <i>c</i> (Å) | <i>V</i> (Å <sup>3</sup> ) | <i>x</i> | <i>y</i> | <i>z</i> |
|----------------|--------------|--------------|--------------|----------------------------|----------|----------|----------|
| Exp. [1]       | 5.741        | 5.866        | 7.691        | 259.01                     | 0.112    | 0.117    | 0.407    |
| Exp. [2]       | 5.746        | 5.868        | 7.695        | 259.43                     | 0.111    | 0.118    | 0.406    |
| GGA-PW91 [2]   | 5.875        | 5.982        | 7.772        | 273.14                     |          |          |          |
| LDA [3]        | 5.866        | 6.0          | 7.357        | 258.94                     | 0.112    | 0.118    | 0.404    |
| optPBE [4]     | 5.85         | 5.99         | 7.95         | 287.58                     |          |          |          |
| SCAN+rVV10 [4] | 5.73         | 5.87         | 7.74         | 260.33                     |          |          |          |
| GGA-PBE        | 5.726        | 5.875        | 8.432        | 283.64                     | 0.109    | 0.117    | 0.413    |
| DFT-D (TS)     | 5.805        | 5.892        | 7.677        | 262.61                     | 0.114    | 0.118    | 0.410    |

**Table S2** Calculated bond lengths, interatomic distances and interlayer distances for the orthorhombic PdSe<sub>2</sub> compared with experimental data. As shown in the insets of Fig. 2(c) in the main text, here *d*<sub>1</sub> is the interlayer Pd-Se distance, *d*<sub>2</sub> and *d*<sub>3</sub> are the Pd-Se bond lengths in the square-planar (PdSe<sub>4</sub>)<sup>2-</sup> structural units, *d*<sub>4</sub> is the Se-Se bond lengths in the (Se<sub>2</sub>)<sup>2-</sup> anions, and *d*<sub>layers</sub> is interlayer spacing. The data calculated within GGA-PBE and DFT-D (TS) are from present work.

|                                | Exp. [1] | Exp. [2] | LDA [3] | GGA-PBE | DFT-D (TS) |
|--------------------------------|----------|----------|---------|---------|------------|
| <i>d</i> <sub>1</sub> (Å)      | 3.268    | 3.261    | 3.125   | 3.604   | 3.288      |
| <i>d</i> <sub>2</sub> (Å)      | 2.438    | 2.449    | 2.486   | 2.454   | 2.447      |
| <i>d</i> <sub>3</sub> (Å)      | 2.444    | 2.440    | 2.487   | 2.448   | 2.448      |
| <i>d</i> <sub>4</sub> (Å)      | 2.360    | 2.378    | 2.393   | 2.367   | 2.363      |
| <i>d</i> <sub>layers</sub> (Å) | 2.415    | 2.40     | 2.266   | 2.753   | 2.452      |

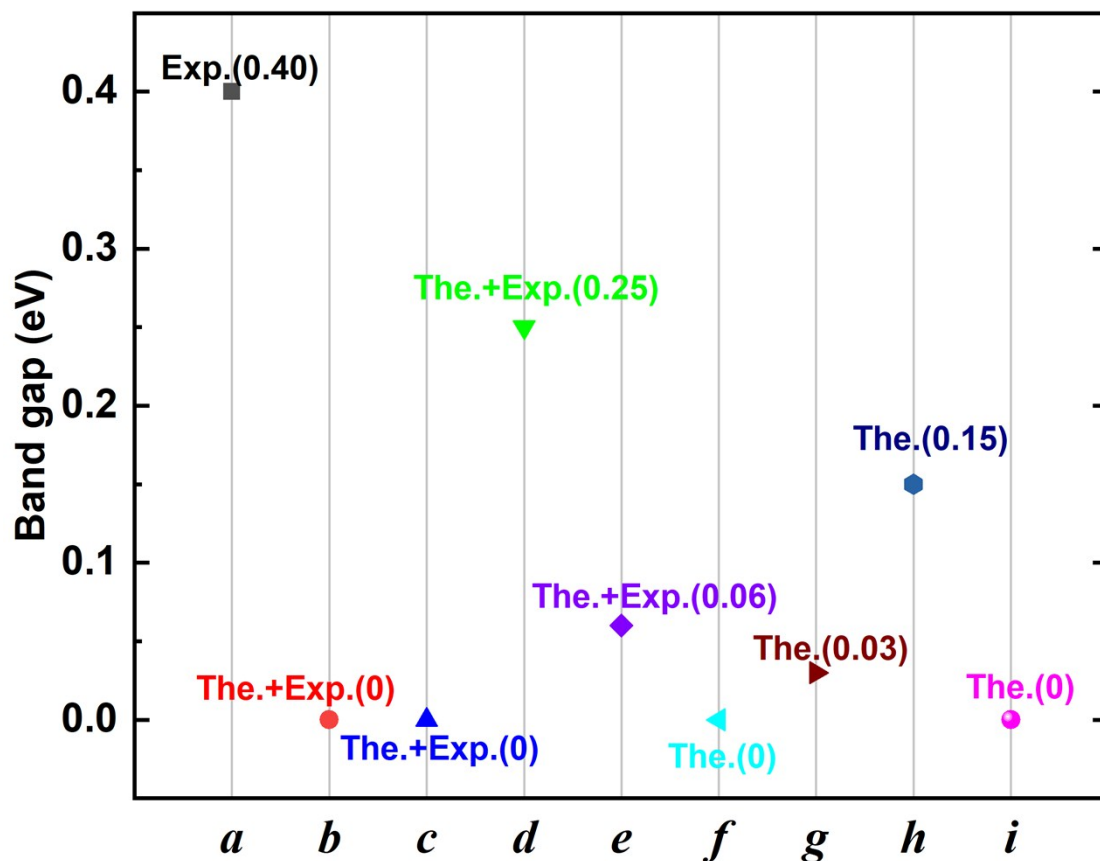

|          | Reference                                                        | Band gap (eV) | Method     |
|----------|------------------------------------------------------------------|---------------|------------|
| <i>a</i> | Journal of Physics and Chemistry of Solids 26 (1965): 639-645    | 0.4           | Exp.       |
| <i>b</i> | Journal of the American Chemical Society 139 (2017): 14090-14097 | 0 (semimetal) | The.+ Exp. |
| <i>c</i> | Advanced Functional Materials 29 (2019): 1806878                 | 0 (semimetal) | The.+ Exp. |
| <i>d</i> | Physical Review B 96 (2017): 060509                              | 0.25          | The.+ Exp. |
| <i>e</i> | Physical Review Letters 121 (2018): 086101                       | 0.06          | The.+ Exp. |
| <i>f</i> | Journal of Physics and Chemistry of Solids 71 (2010): 42-46      | 0 (semimetal) | The.       |
| <i>g</i> | Applied Physics Letters 107 (2015): 153902                       | 0.03          | The.       |
| <i>h</i> | Advanced Materials 29 (2017): 1602969                            | 0.15          | The.       |
| <i>i</i> | ACS Omega 3 (2018): 5971-5979                                    | 0 (semimetal) | The.       |

**Fig. S1** A summary of the band gap for bulk PdSe<sub>2</sub> by experimental measurements (Exp.) or theoretical calculations (The.) from available literature.

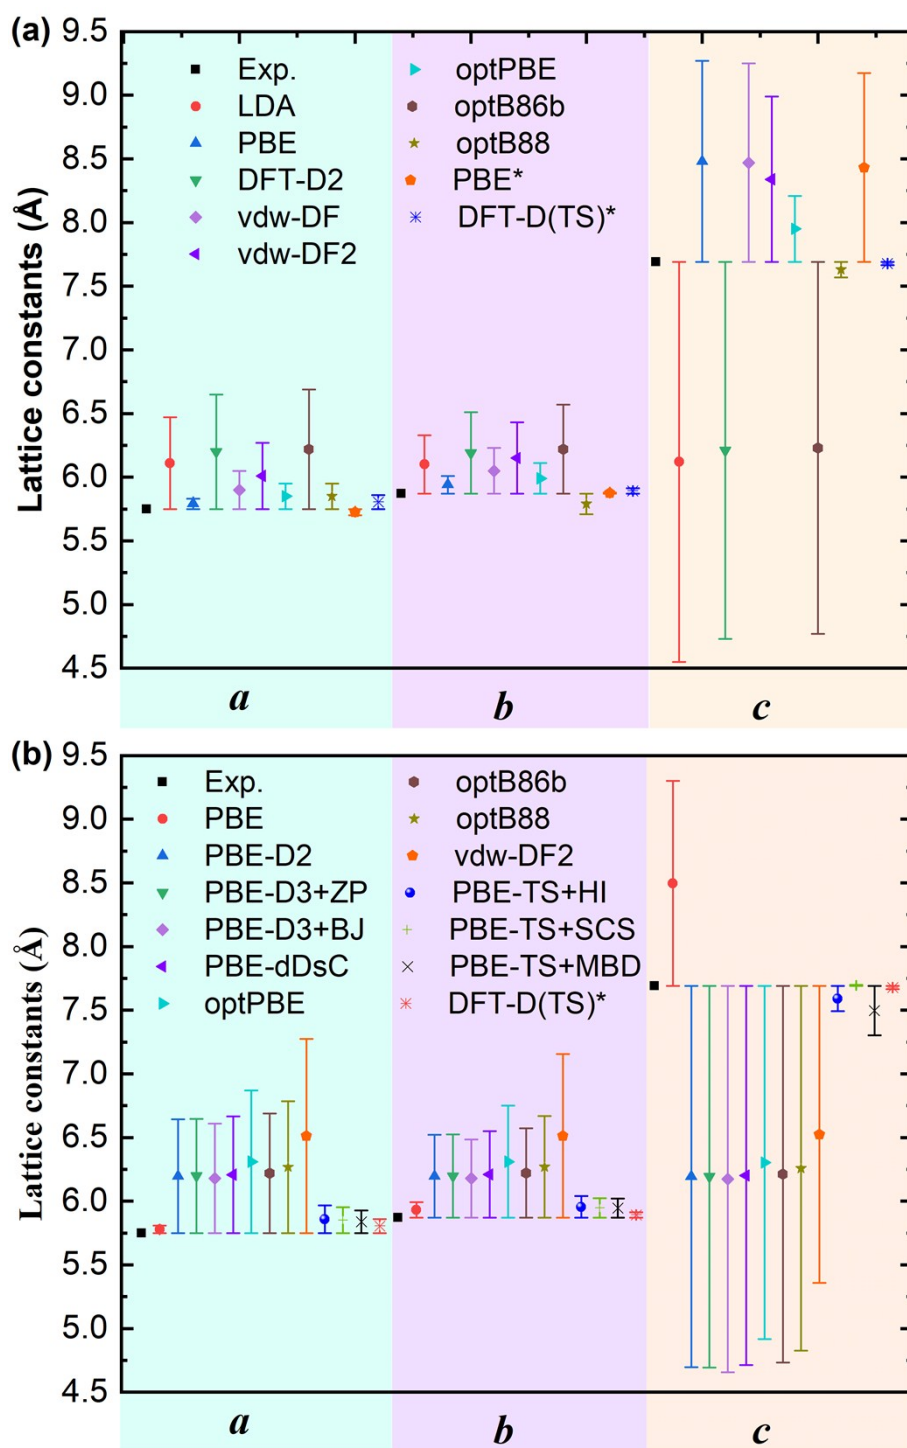

**Fig. S2** The calculated lattice constants of bulk PdSe<sub>2</sub> using different DFT functionals, and the relative error ( $\Delta$ ) with respect to the experimental data. The theoretical calculated results are from: (a) “Journal of the American Chemical Society 2017, 139, 14090-14097” and (b) “ACS Omega 2018, 3, 5971–5979”. The experimental (Exp.) data are from “Inorganic Chemistry 43 (2004): 1943-1949”. The data of PBE\* and DFT-D (TS)\* are from present work.

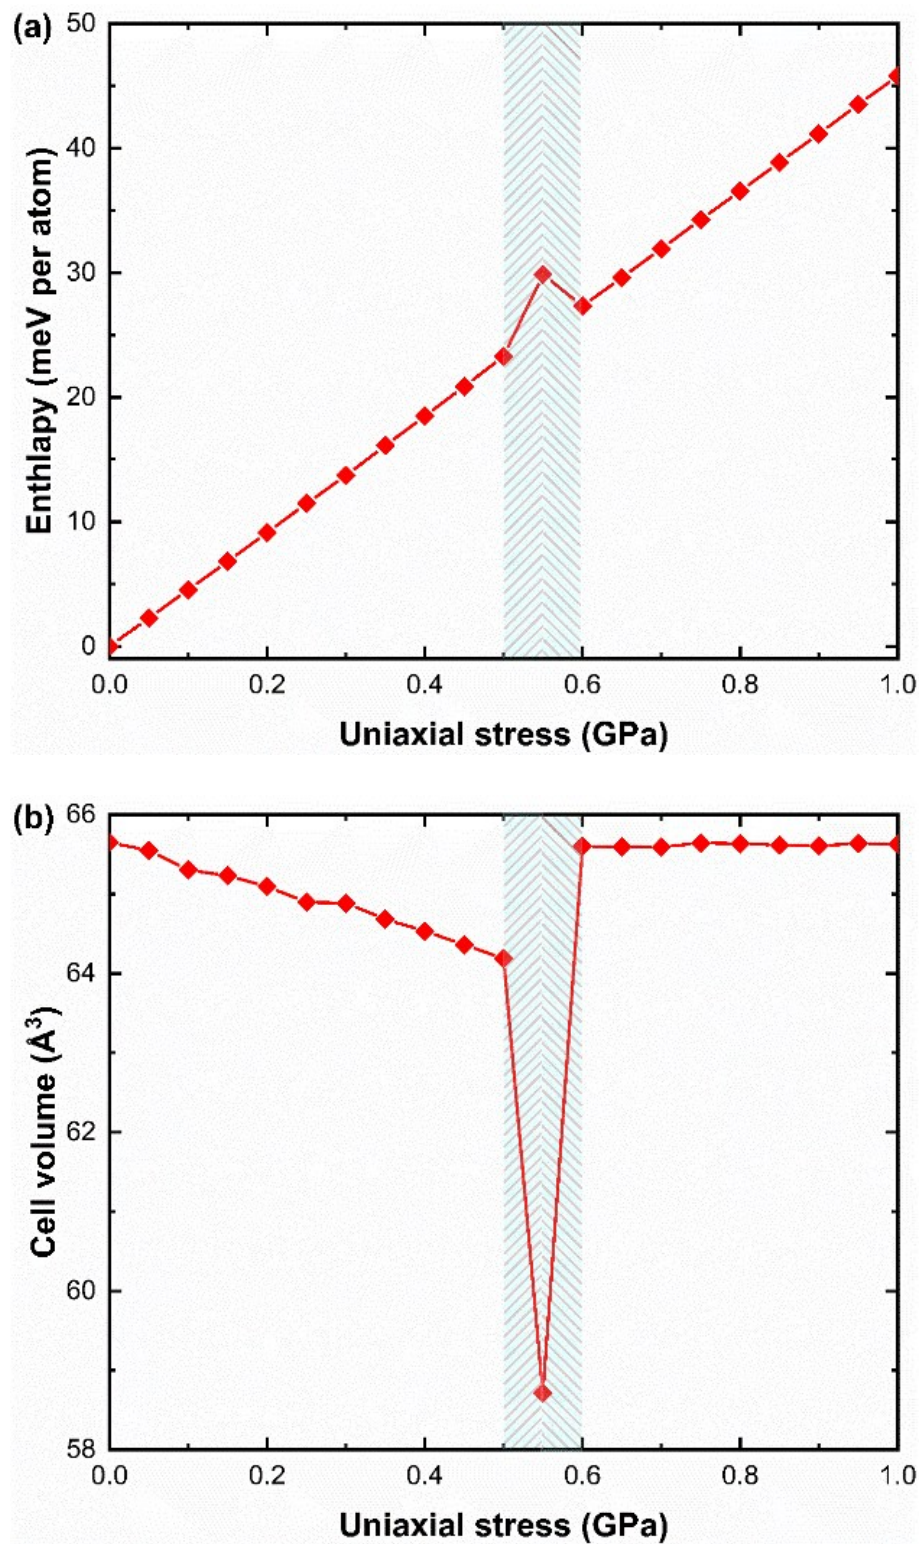

**Fig. S3** The calculated resultant enthalpy (a) and cell volume (b) in response to the uniaxial compressive stress along the *c*-axis.

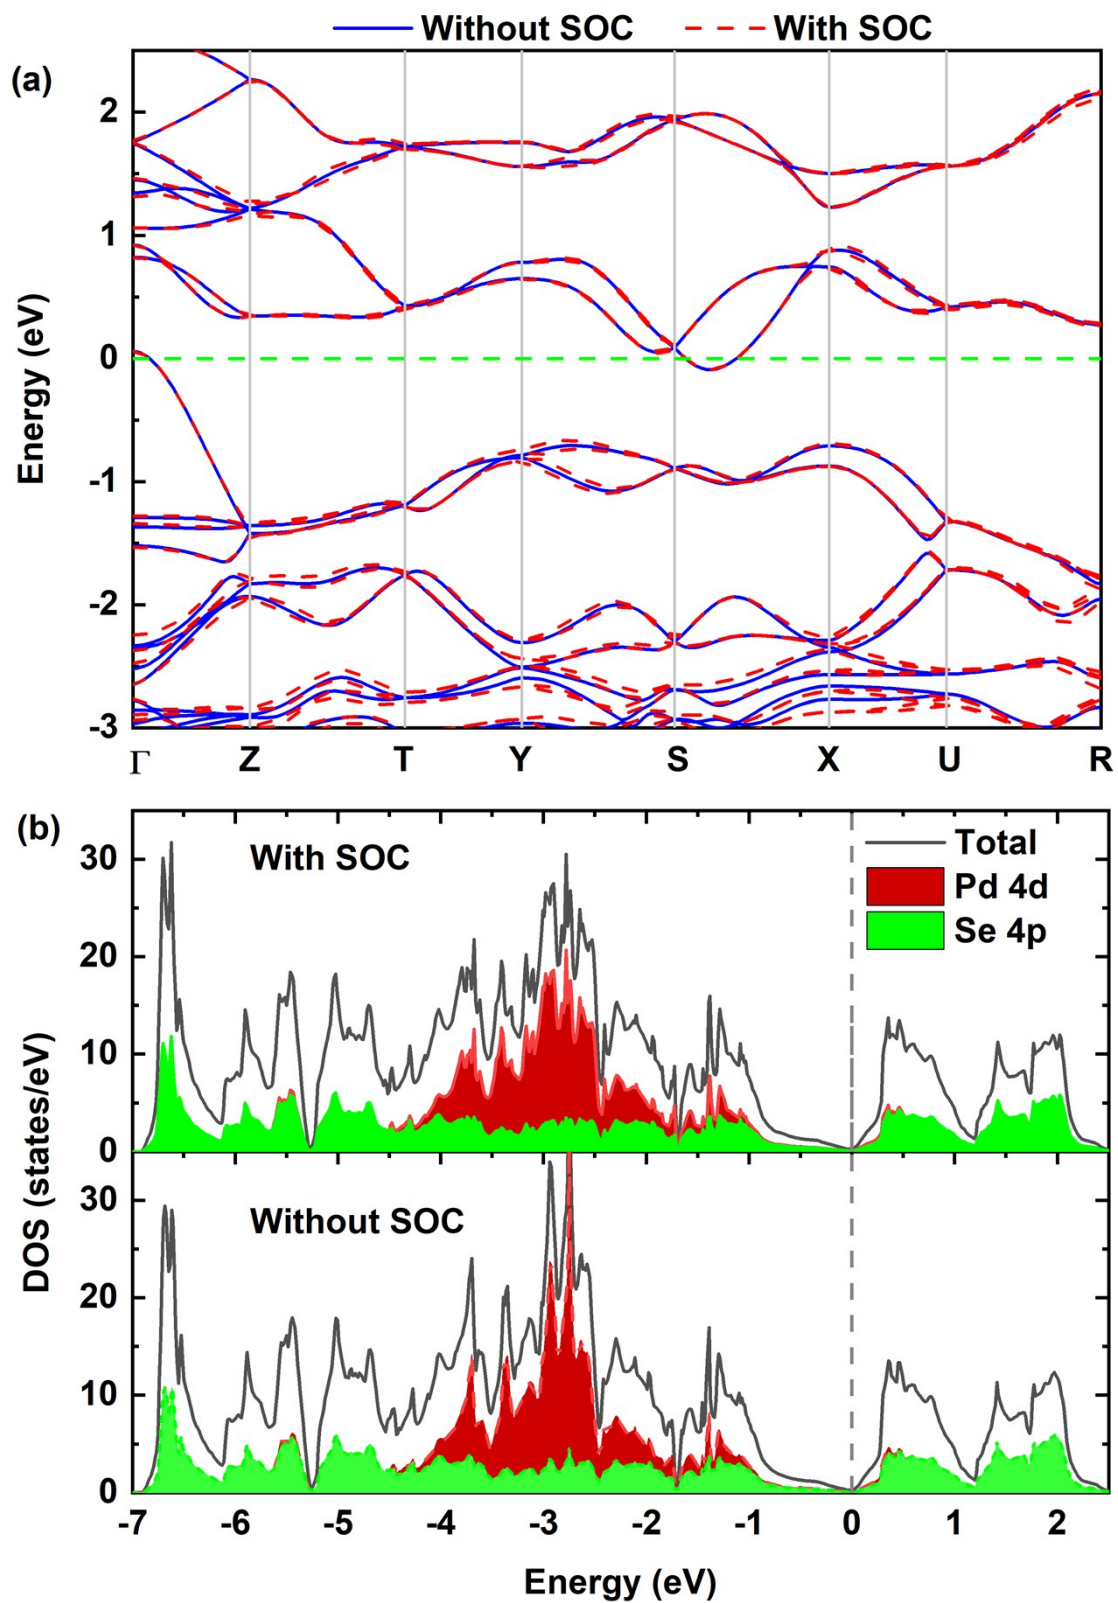

**Fig. S4** Calculated electronic band structure (a) and DOS (b) of bulk PdSe<sub>2</sub> with DFT-D (TS) without/with SOC. The Fermi energy is set to zero for both cases.

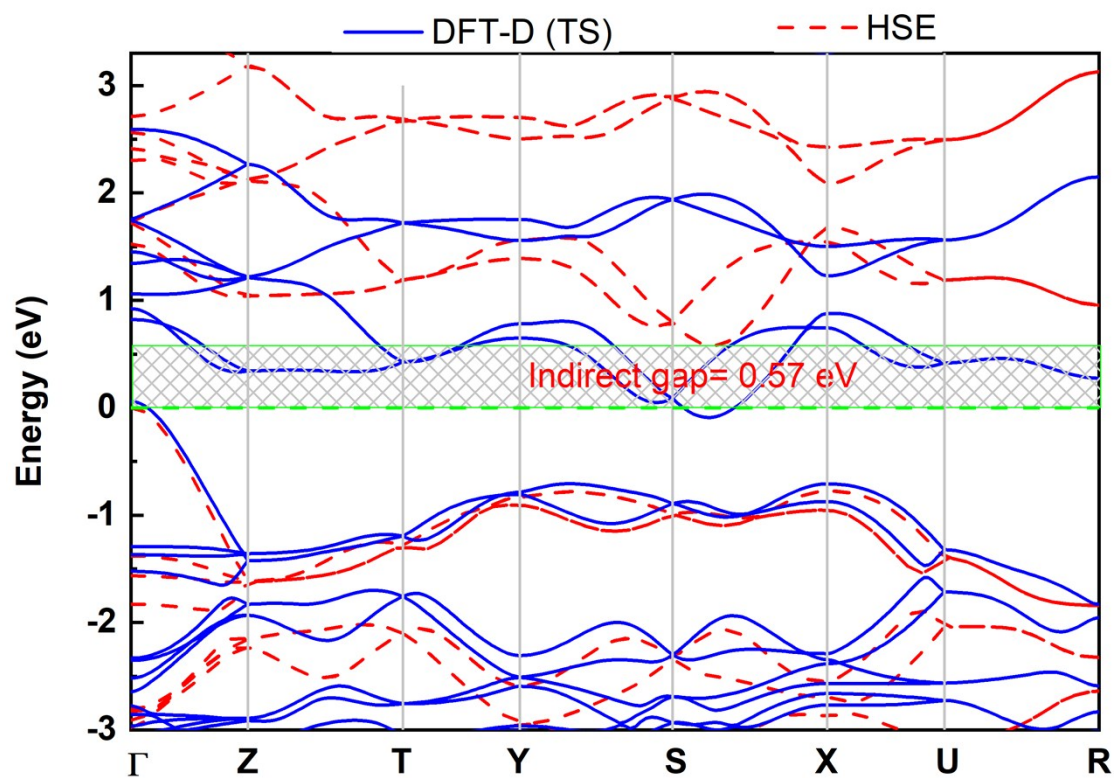

**Fig. S5** Calculated electronic band structure for bulk PdSe<sub>2</sub> with DFT-D (TS) and HSE06 functionals at ambient condition. The Fermi level is set to zero for both cases.

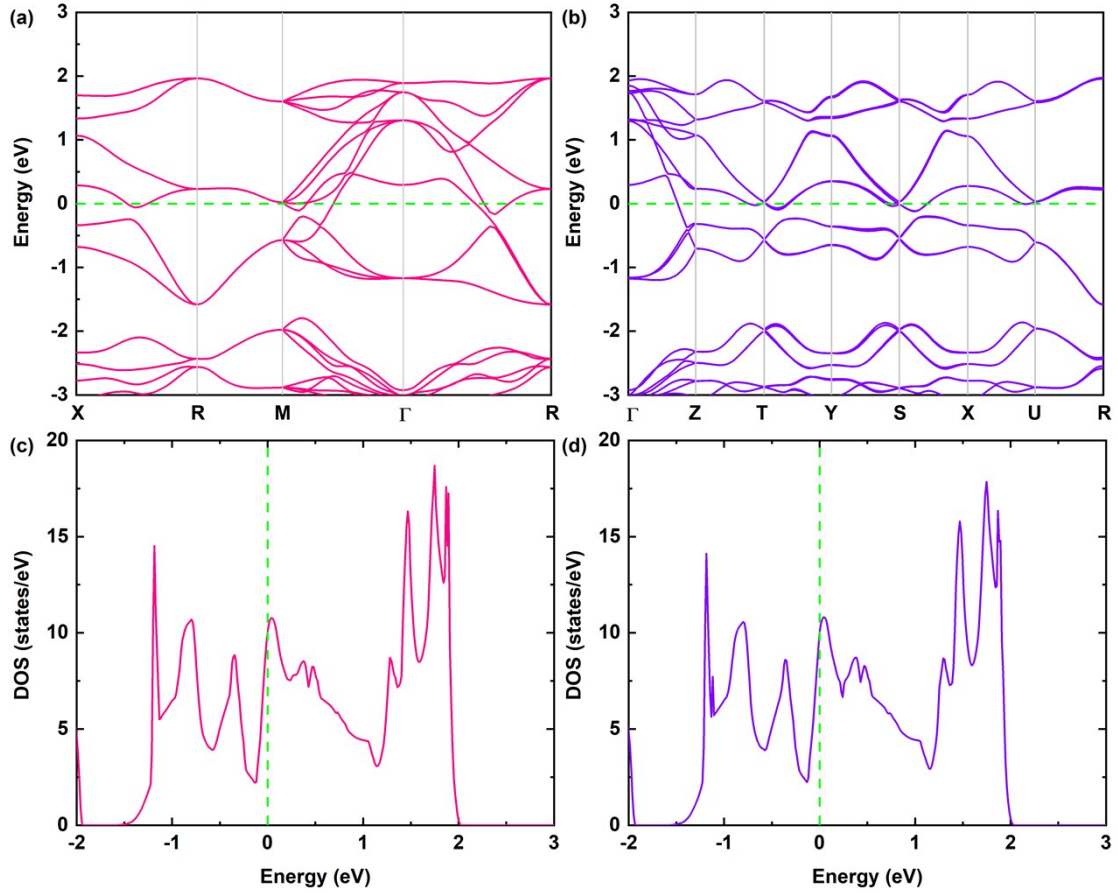

**Fig. S6** Electronic structure of bulk PdSe<sub>2</sub> calculated with DFT-D (TS) at 0.55 GPa (intermediate state II). Because the intermediate state II is a nearly cubic phase with pyrite structure, whose lattice constants are almost equal to each other ( $a = 6.208$ ,  $b = 6.175$ , and  $c = 6.126$  Å). We search the symmetry of the optimized structure at 0.55 GPa with different tolerance factor (low and high precision), and impose the resultant symmetry and space group to the structure model with space group (a)  $Pa\bar{3}$  and (b)  $Pbca$ , respectively. To exclude the influence of the imposing symmetry, we calculate the corresponding density of states (DOS) of bulk PdSe<sub>2</sub> by imposing symmetry  $Pa\bar{3}$  (c) or not (d). The calculated results demonstrate the metallic nature is robust for the intermediate state even using HSE06 functional.



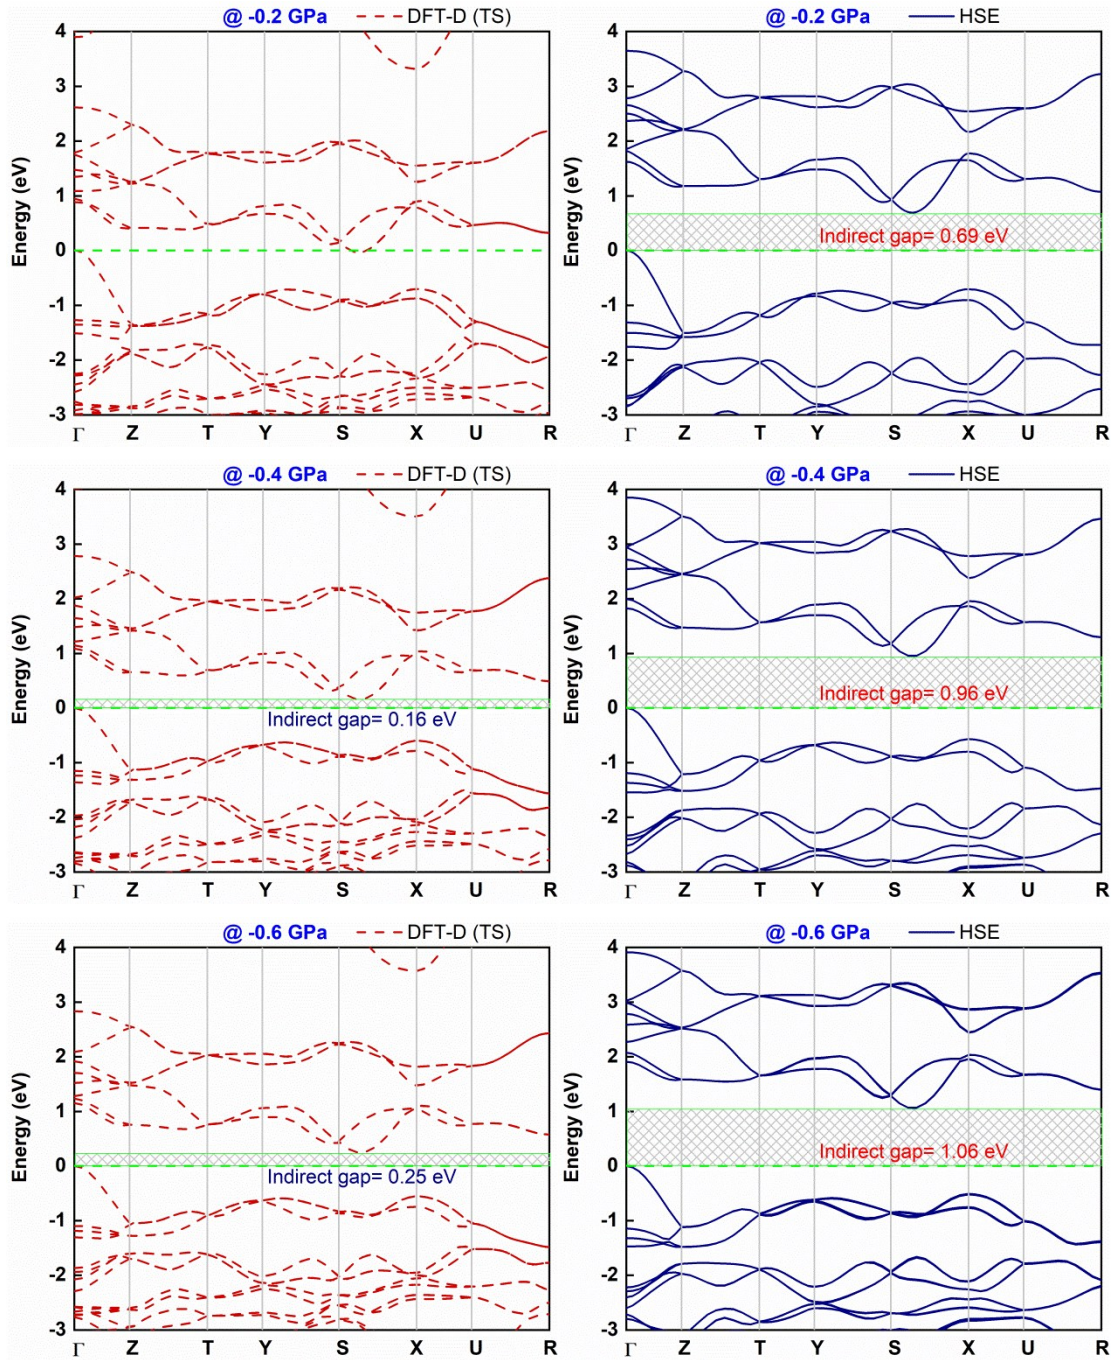

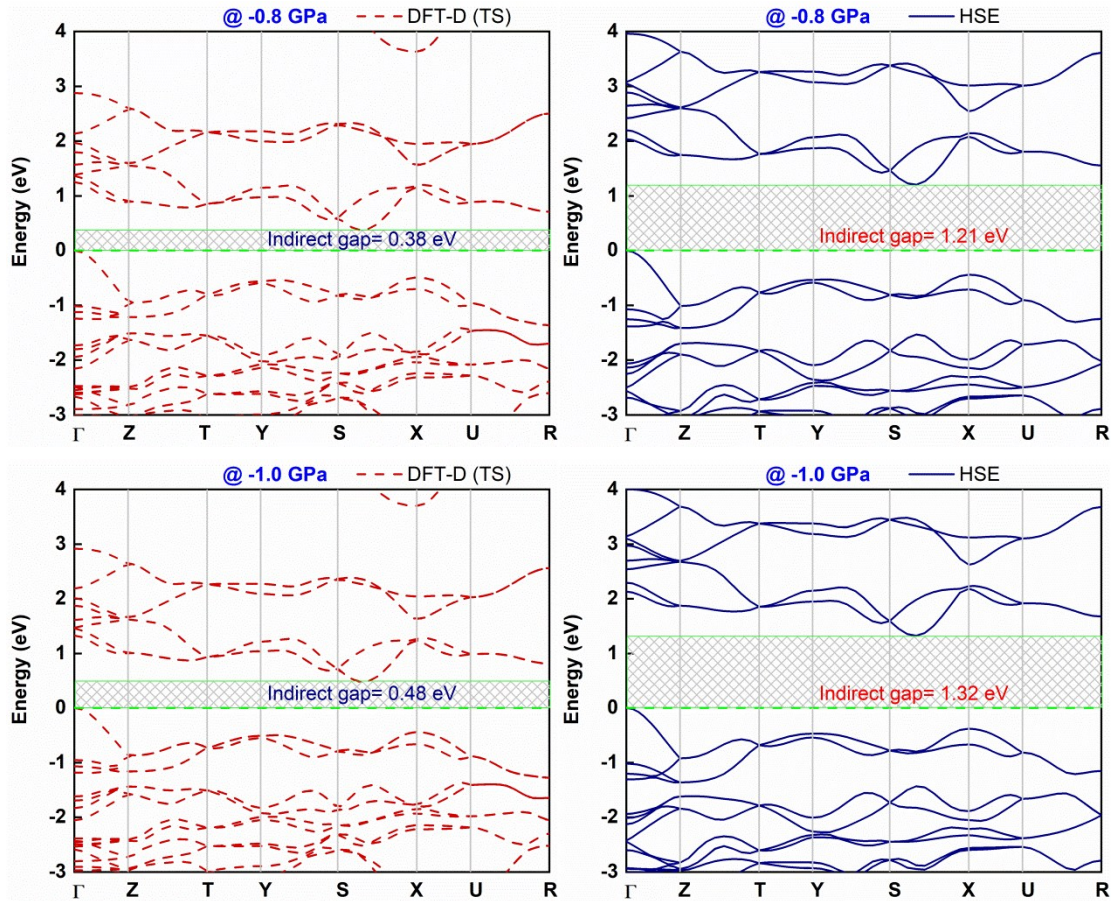

**Fig. S7** Calculated electronic band structure for bulk PdSe<sub>2</sub> with DFT-D (TS) and HSE06 functionals under tensile stress. The Fermi level and VBM are set to zero for both cases. In fact, real Fermi level and VBM are gradually decreases along with the increase of the tensile stress.

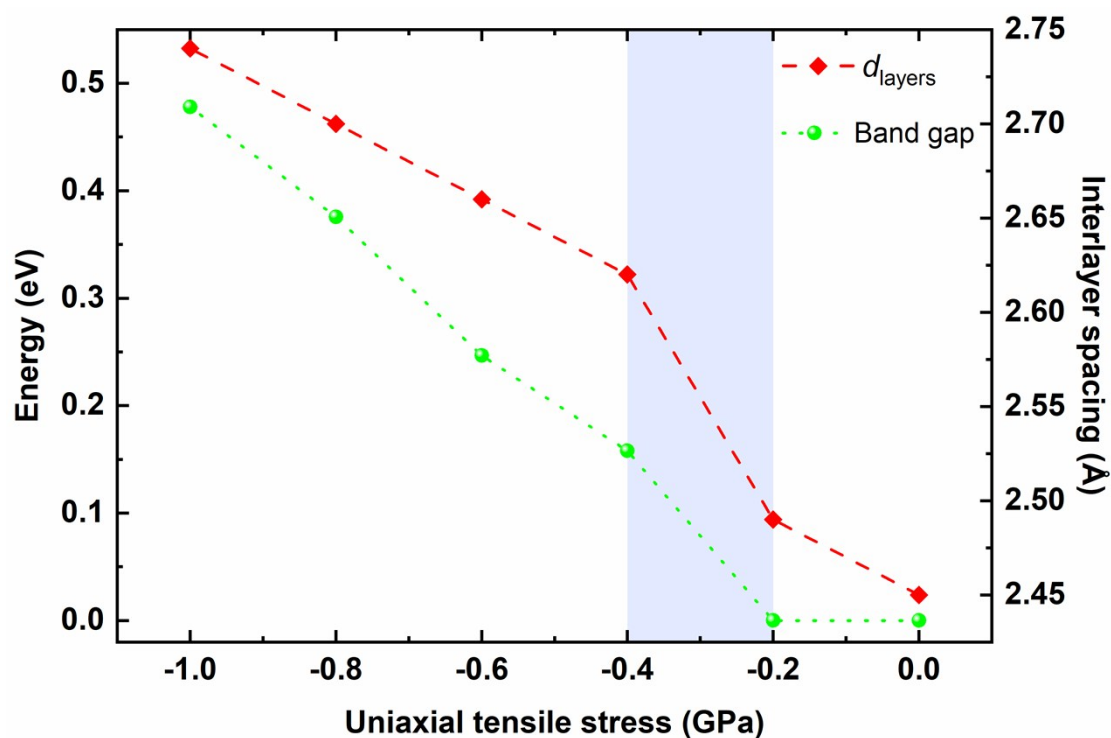

**Fig. S8** The evolution of bandgap and interlayer spacing ( $d_{\text{layers}}$ ) along with the uniaxial tensile stress calculated with DFT-D (TS) functional. The shadow region indicates the rapid increasing of the interlayer spacing and the transition from semimetal to semiconductor.

## Reference

- [1]. Grønvold, F., and E. Røst. "The crystal structure of PdSe<sub>2</sub> and PdS<sub>2</sub>." *Acta Crystallographica* **10** (1957): 329-331.
- [2]. Soulard, C., et al. "Experimental and theoretical investigation on the relative stability of the PdS<sub>2</sub>-and pyrite-type structures of PdSe<sub>2</sub>." *Inorganic Chemistry* **43** (2004): 1943-1949.
- [3]. Hamidani, A., B. Benecer, and K. Zanat. "Structural and electronic properties of the pseudo-binary compounds PdX<sub>2</sub> (X= P, S and Se)." *Journal of Physics and Chemistry of Solids* **71** (2010): 42-46.
- [4]. Oyedele, Akinola D., et al. "PdSe<sub>2</sub>: pentagonal two-dimensional layers with high air stability for electronics." *Journal of the American Chemical Society* **139** (2017): 14090-14097.
- [5]. Zeng, Long-Hui, et al. "Controlled Synthesis of 2D Palladium Diselenide for Sensitive Photodetector Applications." *Advanced Functional Materials* **29** (2019): 1806878.
